# Supplementary material for: Galbut Virus Infection Minimally Influences Drosophila melanogaster Fitness Traits in a Strain and Sex-Dependent Manner
Source: MDPI journal article supplement (doi:10.3390/v15020539), 2023-02-15
Supplement: s1 [file s1]

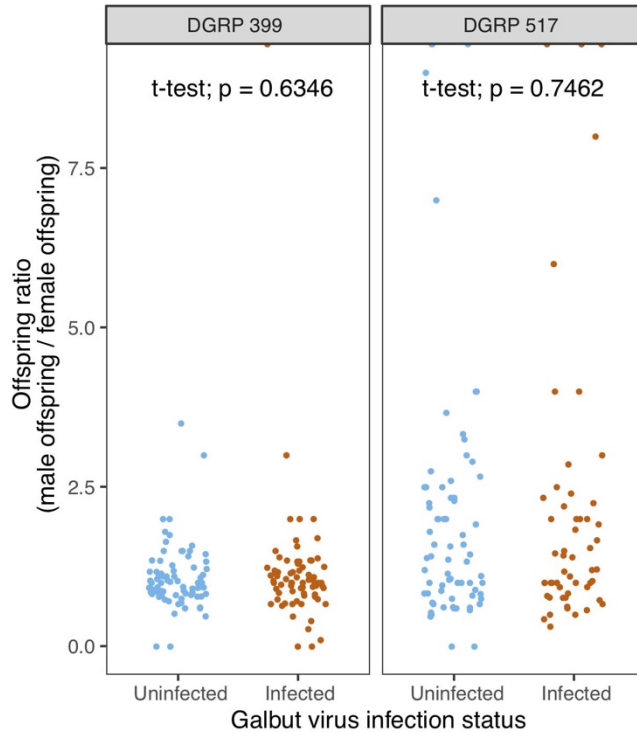

**Supplemental Figure S1.** Galbut virus infection does not influence adult offspring sex ratio. Offspring collected from groups of galbut virus infected or uninfected parents from DGRP 399 and 517 strains every 14 days. Offspring sex ratios from each time point were calculated by dividing total male offspring by total female offspring. No statistical significance was measured in either strain.

**Supplemental Table S1:** Primers used for quantifying levels of galbut virus and microbiome constituents.

| Target                          | Forward (5'-3')               | Reverse (5'-3')            | Reference                                                                                                                  |
|---------------------------------|-------------------------------|----------------------------|----------------------------------------------------------------------------------------------------------------------------|
| Galbut virus                    | CCGTGAAGCAAGGA<br>ATCAAT      | TGCCGATTTTCTGCTCT<br>TTT   | Cross et al:<br><a href="https://doi.org/10.1128/JVI.01070-20">https://doi.org/10.1128/JVI.01070-20</a>                    |
| RpL32 mRNA                      | TGCTAAGCTGTCGCA<br>CAAATGG    | TGCGCTTGTTTCGATCC<br>GTAAC | Cross et al:<br><a href="https://doi.org/10.1128/JVI.01070-20">https://doi.org/10.1128/JVI.01070-20</a>                    |
| <i>Acetobacter</i> spp.         | TAGCTAACGCGATAA<br>GCACA      | ACAGCCTACCCATACA<br>AGCC   | AM Early et al:<br><a href="https://doi.org/10.1371/journal.pone.0170332">https://doi.org/10.1371/journal.pone.0170332</a> |
| <i>Lactobacillus brevis</i>     | TCAGTTTTGAGGGGC<br>TTACCTCTCT | GGCATCCACCATGCGC<br>CCTT   | AM Early et al:<br><a href="https://doi.org/10.1371/journal.pone.0170332">https://doi.org/10.1371/journal.pone.0170332</a> |
| <i>Lactobacillus planatarum</i> | TGCGGCTGGATCACC<br>TCCTTTC    | ACTGGTTCGGTTCCAA<br>TGGGCC | AM Early et al:<br><a href="https://doi.org/10.1371/journal.pone.0170332">https://doi.org/10.1371/journal.pone.0170332</a> |
| <i>Saccharomyces cerevisiae</i> | AGGAGTGCGGTTCTT<br>TG         | TACTTACCGAGGCAAG<br>CTACA  | H Chang et al:<br><a href="https://doi.org/10.1016/j.mimet.2007.08.013">https://doi.org/10.1016/j.mimet.2007.08.013</a>    |
| <i>deformed (dfd)</i>           | GTAGCGAAGAAACC<br>CACCAA      | ACGCTCCACTCACCTC<br>ATTC   | AM Early et al:<br><a href="https://doi.org/10.1371/journal.pone.0170332">https://doi.org/10.1371/journal.pone.0170332</a> |
